# Supplementary material
Source: publisher figshare collection journal article supplement (https://tandf.figshare.com/ndownloader/files/21617166)
Supplement: Supplementary file 1 [file 21617166]

Table S1. Results of linear mixed models ( $\beta$  coefficients and 95% CI) to test the impact of the number of interventions on Co and W urine concentrations in workers grouped by the no. of interventions enforced in the companies. Group 1, 1 intervention; Group 2, 2-3 interventions; Group 3, 4-5 interventions.  $\beta$  coefficients and 95% CI are referred to the fixed effects.

|                                       | Analysis with 3 groups                    |                  |                 |                 |
|---------------------------------------|-------------------------------------------|------------------|-----------------|-----------------|
|                                       | log(CO)                                   | log(CO) adjusted | log(W)          | log(W) adjusted |
| 1 Intervention at T1 vs T0            | -0.218                                    | -0.299           | -0.309          | -0.069          |
|                                       | (-0.567, 0.131)                           | (-0.722, 0.124)  | (-0.685, 0.067) | (-0.495, 0.356) |
| 2 or 3 Interventions vs 1 at T0       | 0.562**                                   | 0.978**          | 0.741**         | 0.748           |
|                                       | (0.136, 0.988)                            | (0.316, 1.639)   | (0.223, 1.260)  | (-0.078, 1.573) |
| 4 or 5 Interventions vs 1 at T0       | 1.062***                                  | 1.209***         | 1.786***        | 1.829***        |
|                                       | (0.615, 1.509)                            | (0.665, 1.753)   | (1.242, 2.330)  | (1.165, 2.493)  |
| Type of company 2 vs 1                |                                           | -0.524           |                 | -0.094          |
|                                       |                                           | (-1.108, 0.061)  |                 | (-0.841, 0.653) |
| Age                                   |                                           | -0.001           |                 | -0.006          |
|                                       |                                           | (-0.021, 0.019)  |                 | (-0.032, 0.019) |
| Wet vs dry                            |                                           | 0.102            |                 | 0.177           |
|                                       |                                           | (-0.307, 0.512)  |                 | (-0.350, 0.704) |
| Years of exposure                     |                                           | 0.004            |                 | 0.008           |
|                                       |                                           | (-0.020, 0.028)  |                 | (-0.023, 0.040) |
| Current smoking                       |                                           | 0.195            |                 | 0.111           |
|                                       |                                           | (-0.169, 0.559)  |                 | (-0.358, 0.579) |
| 2 or 3 Interventions vs 1 at T1 vs T0 | -0.010                                    | 0.092            | -0.062          | -0.281          |
|                                       | (-0.518, 0.497)                           | (-0.486, 0.671)  | (-0.611, 0.486) | (-0.865, 0.304) |
| 4 or 5 Interventions vs 1 at T1 vs T0 | -0.355                                    | 0.054            | -0.289          | -0.327          |
|                                       | (-0.908, 0.198)                           | (-0.643, 0.751)  | (-0.888, 0.310) | (-1.038, 0.384) |
| Constant                              | -0.218                                    | -0.390           | 0.036           | 0.056           |
|                                       | (-0.521, 0.085)                           | (-1.256, 0.476)  | (-0.332, 0.405) | (-1.047, 1.159) |
| Note:                                 | . p<0.1, * p<0.05, ** p<0.01, *** p<0.001 |                  |                 |                 |
